# Supplementary material
Source: ML conference proceedings conference paper supplement (https://proceedings.mlr.press/v139/lou21a.html)
Supplement: Supplementary file 1 [file lou21a-supp.pdf]

# Appendix

## 1. Neural Network Architecture

Our CNN baseline is AlexNet. Table 1~3 show the architectural details of SqueezeNet, Ours\_F34, and Ours\_I789, respectively. More specifically, the input channel numbers, output channel numbers, kernel size, stride size, and padding size in each layer of a neural network are listed. For PPNNs, each *ReLU* activation is approximated by a degree-2 polynomial, and each max pooling is converted to an average pooling.

SqueezeNet is shown in Table 1, where Conv2-1 and Conv2-2 in each Fire module are concatenated instead stacked. Ours\_F34 shown in Table 2 replaces the last two fire modules, i.e., F3 and F4, by C3 and C4. Table 3 shows Ours\_I789 replaces the last three Inception modules in InceptionNet by C3, C4, and C5 convolutions. We use BN. in Table 3 to represent Batch Normalization. And the BN.+*ReLU* after a convolution in an Inception module is hidden in Table 3. The pair of Conv2-1 and Conv2-2 is stacked. Similarly, the pair of Conv3-1 and Conv3-2 also is stacked. But Conv1, Conv2, Conv3 and Conv4 in each Inception are concatenated.

Table 1. The network architecture of SqueezeNet on CIFAR-10.

| Block | Descriptions    | Input Channel | Output Channel | Kernel Size | Stride | Padding |
|-------|-----------------|---------------|----------------|-------------|--------|---------|
| C1    | Convolution     | 3             | 64             | 3           | 1      | 0       |
| P1    | Avg. Pool       | -             | -              | 3           | 2      | 0       |
| F1    | Conv1.          | 64            | 32             | 1           | 1      | 0       |
|       | <i>ReLU</i> 1   | -             | -              | -           | -      | -       |
|       | Conv2-1         | 32            | 64             | 1           | 1      | 0       |
|       | <i>ReLU</i> 2-1 | -             | -              | -           | -      | -       |
|       | Conv2-2.        | 32            | 64             | 3           | 1      | 0       |
| F2    | Conv1.          | 128           | 32             | 1           | 1      | 0       |
|       | <i>ReLU</i> 1   | -             | -              | -           | -      | -       |
|       | Conv2-1         | 32            | 64             | 1           | 1      | 0       |
|       | <i>ReLU</i> 2-1 | -             | -              | -           | -      | -       |
|       | Conv2-2.        | 32            | 64             | 3           | 1      | 0       |
| F3    | Conv1.          | 128           | 32             | 1           | 1      | 0       |
|       | <i>ReLU</i> 1   | -             | -              | -           | -      | -       |
|       | Conv2-1         | 32            | 128            | 1           | 1      | 0       |
|       | <i>ReLU</i> 2-1 | -             | -              | -           | -      | -       |
|       | Conv2-2.        | 32            | 128            | 3           | 1      | 0       |
| F4    | Conv1.          | 256           | 32             | 1           | 1      | 0       |
|       | <i>ReLU</i> 1   | -             | -              | -           | -      | -       |
|       | Conv2-1         | 32            | 128            | 1           | 1      | 0       |
|       | <i>ReLU</i> 2-1 | -             | -              | -           | -      | -       |
|       | Conv2-2.        | 32            | 128            | 3           | 1      | 0       |
| C2    | Convolution     | 256           | 10             | 1           | 1      | 0       |
| P3    | Avg. Pool       | -             | -              | -           | -      | 0       |

Table 2. The network architecture of Our\_F34 on CIFAR-10.

| Block | Descriptions    | Input Channel | Output Channel | Kernel Size | Stride | Padding |
|-------|-----------------|---------------|----------------|-------------|--------|---------|
| C1    | Convolution     | 3             | 64             | 3           | 1      | 0       |
| P1    | Avg. Pool       | -             | -              | 3           | 2      | 0       |
| F1    | Conv1.          | 64            | 32             | 1           | 1      | 0       |
|       | <i>ReLU</i> 1   | -             | -              | -           | -      | -       |
|       | Conv2-1         | 32            | 64             | 1           | 1      | 0       |
|       | <i>ReLU</i> 2-1 | -             | -              | -           | -      | -       |
|       | Conv2-2.        | 32            | 64             | 3           | 1      | 0       |
| F2    | Conv1.          | 128           | 32             | 1           | 1      | 0       |
|       | <i>ReLU</i> 1   | -             | -              | -           | -      | -       |
|       | Conv2-1         | 32            | 64             | 1           | 1      | 0       |
|       | <i>ReLU</i> 2-1 | -             | -              | -           | -      | -       |
|       | Conv2-2.        | 32            | 64             | 3           | 1      | 0       |
| P2    | Avg. Pool       | -             | -              | 3           | 2      | 0       |
| C2    | Convolution     | 128           | 256            | 3           | 1      | 0       |
|       | <i>ReLU</i>     | -             | -              | -           | -      | -       |
| C3    | Convolution     | 256           | 256            | 3           | 1      | 0       |
|       | <i>ReLU</i>     | -             | -              | -           | -      | -       |
| C4    | Convolution     | 256           | 10             | 1           | 1      | 0       |
| P3    | Avg. Pool       | -             | -              | -           | -      | 0       |

Table 3. The network architecture of Our\_I789 on CIFAR-10.

| Block    | Descriptions     | Input Channel | Output Channel | Kernel Size | Stride | Padding |   |
|----------|------------------|---------------|----------------|-------------|--------|---------|---|
| C1       | Convolution      | 3             | 192            | 3           | 1      | 1       |   |
| B1       | BN.+ <i>ReLU</i> | -             | -              | 3           | 2      | 0       |   |
| I1       | Conv1.           | 192           | 64             | 1           | 1      | 0       |   |
|          | Conv2-1.         | 192           | 96             | 1           | 1      | 0       |   |
|          | Conv2-2.         | 96            | 128            | 3           | 1      | 0       |   |
|          | Conv3-1.         | 192           | 16             | 1           | 1      | 0       |   |
|          | Conv3-2.         | 16            | 32             | 5           | 1      | 0       |   |
| I2       | Conv4.           | 192           | 32             | 1           | 1      | 0       |   |
|          | Conv1.           | 256           | 128            | 1           | 1      | 0       |   |
|          | Conv2-1.         | 256           | 128            | 1           | 1      | 0       |   |
|          | Conv2-2.         | 128           | 192            | 3           | 1      | 0       |   |
|          | Conv3-1.         | 256           | 32             | 1           | 1      | 0       |   |
| P1       | Conv3-2.         | 32            | 96             | 5           | 1      | 0       |   |
|          | Conv4.           | 256           | 64             | 1           | 1      | 0       |   |
|          | Avg. Pool        | -             | -              | 3           | 2      | 1       |   |
|          | I3               | Conv1.        | 480            | 192         | 1      | 1       | 0 |
|          |                  | Conv2-1.      | 480            | 96          | 1      | 1       | 0 |
| Conv2-2. |                  | 96            | 208            | 3           | 1      | 0       |   |
| Conv3-1. |                  | 480           | 16             | 1           | 1      | 0       |   |
| Conv3-2. |                  | 16            | 48             | 5           | 1      | 0       |   |
| I4       | Conv4.           | 480           | 64             | 1           | 1      | 0       |   |
|          | Conv1.           | 512           | 128            | 1           | 1      | 0       |   |
|          | Conv2-1.         | 512           | 128            | 1           | 1      | 0       |   |
|          | Conv2-2.         | 128           | 192            | 3           | 1      | 0       |   |
|          | Conv3-1.         | 512           | 32             | 1           | 1      | 0       |   |
| I5       | Conv3-2.         | 32            | 96             | 5           | 1      | 0       |   |
|          | Conv4.           | 512           | 64             | 1           | 1      | 0       |   |
|          | Conv1.           | 512           | 128            | 1           | 1      | 0       |   |
|          | Conv2-1.         | 512           | 128            | 1           | 1      | 0       |   |
|          | Conv2-2.         | 128           | 256            | 3           | 1      | 0       |   |
| I6       | Conv3-1.         | 512           | 24             | 1           | 1      | 0       |   |
|          | Conv3-2.         | 24            | 64             | 5           | 1      | 0       |   |
|          | Conv4.           | 512           | 64             | 1           | 1      | 0       |   |
|          | Conv1.           | 512           | 112            | 1           | 1      | 0       |   |
|          | Conv2-1.         | 512           | 144            | 1           | 1      | 0       |   |
| I7       | Conv2-2.         | 144           | 288            | 3           | 1      | 0       |   |
|          | Conv3-1.         | 512           | 32             | 1           | 1      | 0       |   |
|          | Conv3-2.         | 32            | 64             | 5           | 1      | 0       |   |
|          | Conv4.           | 512           | 64             | 1           | 1      | 0       |   |
|          | C3               | Convolution   | 528            | 832         | 3      | 1       | 1 |
| C4       | Convolution      | 832           | 832            | 3           | 1      | 1       |   |
| C5       | Convolution      | 832           | 1024           | 3           | 1      | 1       |   |
| P2       | Avg. Pool        | -             | -              | 3           | 2      | 1       |   |
| D1       | Dense            | 1024          | 10             | 1           | -      | -       |   |
